# Supplementary material
Source: PubMed Central journal article supplement (PMC4955629)
Supplement: NIHMS746543-supplement-supplement_1.pdf [file NIHMS746543-supplement-supplement_1.pdf]

## Appendix Tables.

| <b>Table S1: Location of Clinic Visits by Region and State</b> |                          |                   |                                 |                |
|----------------------------------------------------------------|--------------------------|-------------------|---------------------------------|----------------|
|                                                                | <b>Breast<br/>Cancer</b> | <b>Depression</b> | <b>Rheumatoid<br/>Arthritis</b> | <b>Overall</b> |
| <b>East North Central</b>                                      | <b>98</b>                | <b>105</b>        | <b>47</b>                       | <b>250</b>     |
| Illinois                                                       | 13                       | 45                | 0                               | 58             |
| Indiana                                                        | 34                       | 13                | 0                               | 47             |
| Michigan                                                       | 18                       | 17                | 0                               | 35             |
| Ohio                                                           | 33                       | 28                | 47                              | 108            |
| Wisconsin                                                      | 0                        | 2                 | 0                               | 2              |
| <b>East South Central</b>                                      | <b>23</b>                | <b>21</b>         | <b>69</b>                       | <b>113</b>     |
| Kentucky                                                       | 23                       | 4                 | 0                               | 27             |
| Mississippi                                                    | 0                        | 17                | 0                               | 17             |
| Tennessee                                                      | 0                        | 0                 | 69                              | 69             |
| <b>Middle Atlantic</b>                                         | <b>56</b>                | <b>85</b>         | <b>100</b>                      | <b>241</b>     |
| New Jersey                                                     | 29                       | 19                | 0                               | 48             |
| New York                                                       | 27                       | 35                | 100                             | 162            |
| Pennsylvania                                                   | 0                        | 31                | 0                               | 31             |
| <b>Mountain</b>                                                | <b>80</b>                | <b>22</b>         | <b>0</b>                        | <b>102</b>     |
| Arizona                                                        | 36                       | 22                | 0                               | 58             |
| Colorado                                                       | 44                       | 0                 | 0                               | 44             |
| <b>New England</b>                                             | <b>41</b>                | <b>39</b>         | <b>20</b>                       | <b>100</b>     |
| Connecticut                                                    | 41                       | 0                 | 0                               | 41             |
| Massachusetts                                                  | 0                        | 39                | 20                              | 59             |
| <b>Pacific</b>                                                 | <b>74</b>                | <b>18</b>         | <b>177</b>                      | <b>269</b>     |
| California                                                     | 74                       | 0                 | 177                             | 251            |
| Hawaii                                                         | 0                        | 18                | 0                               | 18             |
| <b>South Atlantic</b>                                          | <b>222</b>               | <b>41</b>         | <b>50</b>                       | <b>313</b>     |
| Delaware                                                       | 8                        | 0                 | 0                               | 8              |
| District of Columbia                                           | 0                        | 0                 | 6                               | 6              |
| Florida                                                        | 68                       | 0                 | 33                              | 101            |
| Georgia                                                        | 126                      | 27                | 0                               | 153            |
| Maryland                                                       | 15                       | 0                 | 9                               | 24             |
| North Carolina                                                 | 0                        | 5                 | 2                               | 7              |
| South Carolina                                                 | 0                        | 8                 | 0                               | 8              |
| Virginia                                                       | 0                        | 1                 | 0                               | 1              |
| West Virginia                                                  | 5                        | 0                 | 0                               | 5              |
| <b>West North Central</b>                                      | <b>23</b>                | <b>55</b>         | <b>102</b>                      | <b>180</b>     |
| Iowa                                                           | 0                        | 0                 | 50                              | 50             |
| Kansas                                                         | 0                        | 22                | 0                               | 22             |
| Minnesota                                                      | 0                        | 33                | 0                               | 33             |
| Missouri                                                       | 0                        | 0                 | 52                              | 52             |

Appendix Tables.

|                           |            |            |            |             |
|---------------------------|------------|------------|------------|-------------|
| South Dakota              | 23         | 0          | 0          | 23          |
| <b>West South Central</b> | <b>60</b>  | <b>36</b>  | <b>91</b>  | <b>187</b>  |
| Louisiana                 | 0          | 0          | 42         | 42          |
| Oklahoma                  | 25         | 1          | 0          | 26          |
| Texas                     | 35         | 35         | 49         | 119         |
| <b>Overall</b>            | <b>677</b> | <b>422</b> | <b>656</b> | <b>1755</b> |

## Appendix Tables.

| <b>Table S2: Location of Clinic Visits by Zip Code</b> |                         |
|--------------------------------------------------------|-------------------------|
| <b>Zip Code</b>                                        | <b>Number of Visits</b> |
| 02067                                                  | 20                      |
| 02356                                                  | 22                      |
| 02420                                                  | 17                      |
| 06437                                                  | 7                       |
| 06612                                                  | 2                       |
| 06844                                                  | 32                      |
| 07001                                                  | 1                       |
| 07024                                                  | 9                       |
| 07109                                                  | 2                       |
| 07666                                                  | 12                      |
| 08057                                                  | 14                      |
| 08902                                                  | 10                      |
| 10012                                                  | 12                      |
| 10021                                                  | 2                       |
| 10306                                                  | 19                      |
| 10506                                                  | 24                      |
| 11001                                                  | 35                      |
| 11559                                                  | 1                       |
| 11576                                                  | 40                      |
| 13078                                                  | 25                      |
| 16201                                                  | 23                      |
| 18966                                                  | 7                       |
| 19096                                                  | 1                       |
| 19803                                                  | 8                       |
| 20036                                                  | 6                       |
| 20659                                                  | 12                      |
| 20723                                                  | 2                       |
| 21093                                                  | 3                       |
| 21228                                                  | 3                       |
| 21239                                                  | 4                       |
| 23455                                                  | 1                       |
| 26241                                                  | 5                       |
| 27889                                                  | 5                       |
| 28721                                                  | 2                       |
| 29201                                                  | 8                       |
| 30030                                                  | 27                      |
| 30224                                                  | 21                      |
| 30281                                                  | 7                       |
| 30318                                                  | 21                      |

## Appendix Tables.

|       |    |
|-------|----|
| 30474 | 21 |
| 30501 | 12 |
| 31021 | 16 |
| 31210 | 28 |
| 32258 | 20 |
| 32405 | 1  |
| 33308 | 30 |
| 33414 | 23 |
| 33434 | 9  |
| 33609 | 1  |
| 34238 | 2  |
| 34471 | 5  |
| 34698 | 1  |
| 34788 | 9  |
| 37232 | 26 |
| 38501 | 43 |
| 39180 | 17 |
| 41701 | 23 |
| 42001 | 4  |
| 43220 | 2  |
| 44094 | 13 |
| 44131 | 13 |
| 45242 | 33 |
| 45662 | 47 |
| 46383 | 13 |
| 47201 | 27 |
| 47591 | 7  |
| 48302 | 17 |
| 48309 | 6  |
| 48315 | 12 |
| 52240 | 50 |
| 53211 | 2  |
| 57201 | 23 |
| 60076 | 4  |
| 60126 | 4  |
| 60175 | 9  |
| 60194 | 15 |
| 60201 | 4  |
| 60443 | 4  |
| 60631 | 5  |
| 61820 | 13 |
| 63701 | 52 |
| 66048 | 19 |

## Appendix Tables.

|            |    |
|------------|----|
| 66210      | 3  |
| 70601      | 42 |
| 73013      | 25 |
| 73112      | 1  |
| 75001      | 2  |
| 75042      | 10 |
| 75082      | 39 |
| 75225      | 13 |
| 75762      | 16 |
| 76012      | 14 |
| 76210      | 8  |
| 78413      | 17 |
| 80205      | 7  |
| 80401      | 37 |
| 85395      | 25 |
| 85901      | 3  |
| 86403      | 8  |
| 86429      | 22 |
| 90077      | 44 |
| 90712      | 41 |
| 90720      | 6  |
| 91767      | 5  |
| 92308      | 15 |
| 92833      | 36 |
| 92835      | 45 |
| 93720      | 18 |
| 94708      | 1  |
| 95350      | 40 |
| 96701      | 18 |
| 10591-1606 | 4  |
| 55124-6626 | 33 |
